# Supplementary material for: PKA phosphorylation reshapes the pharmacological kinetics of BmK AS, a unique site-4 sodium channel-specific modulator
Source: PubMed Central journal article supplement — Sci Rep. 2014 Jan 16;4:3721. doi: 10.1038/srep03721 (PMC5379197; doi:10.1038/srep03721), 2014-01-16
Supplement: srep03721-s1.pdf [file srep03721-s1.pdf]

## Supplementary information

### PKA phosphorylation reshapes the pharmacological kinetics of Bmk AS, a unique site-4 sodium channel-specific modulator

Liu ZR, Zhang H, Wu JQ, Zhou JJ, Ji YH

#### 1. Supplementary figures and figure legends:

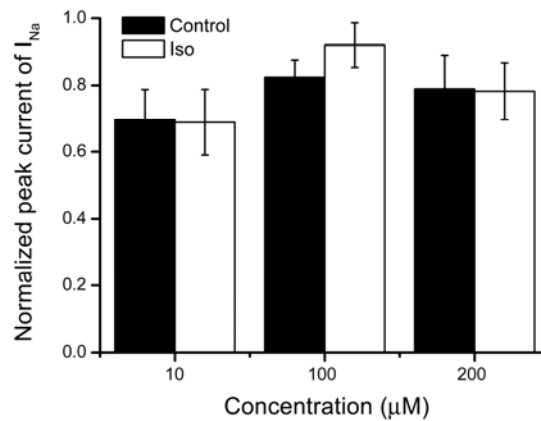

Figure S1. Effects of isoproterenol on peak  $Na^+$  current of  $Na_v1.2\alpha$  alone. Peak  $Na^+$  currents of  $Na_v1.2\alpha$  were normalized to the mean amplitudes in each group of oocytes tested.

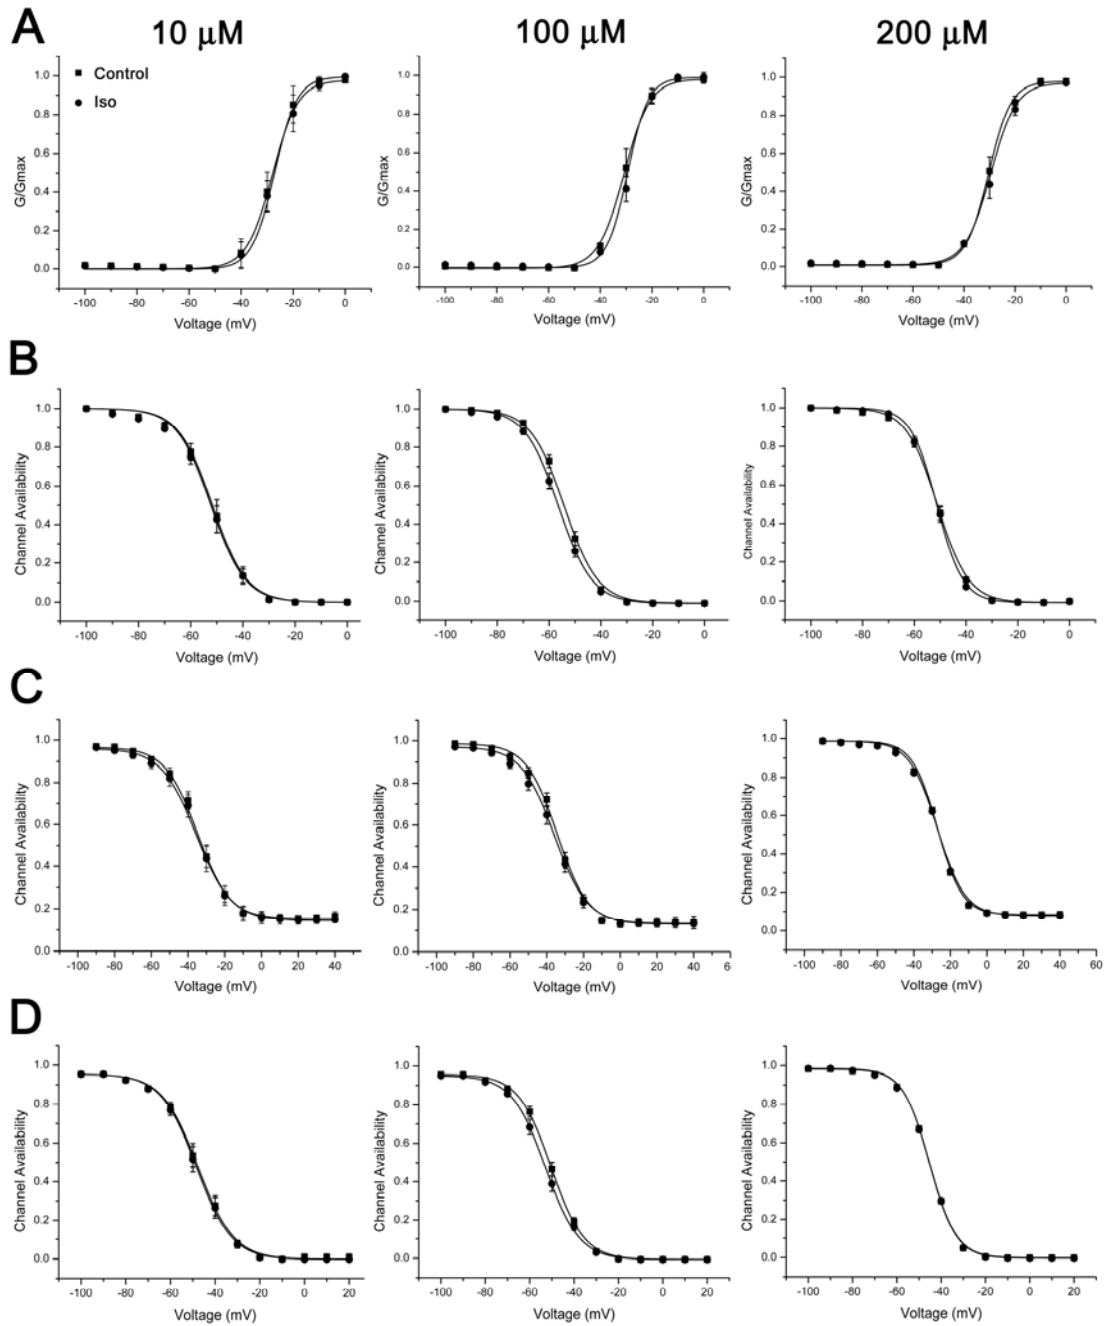

Figure S2. Effect of isoproterenol on the voltage-dependent activation and inactivation of  $\text{Na}_v1.2\alpha$ . Statistical plots of the G-V relationship for activation (A) and I-V relationship for steady-state, fast and slow inactivation (B-D) of phosphorylated (solid circle) and non-phosphorylated (solid box)  $\text{Na}_v1.2$ .

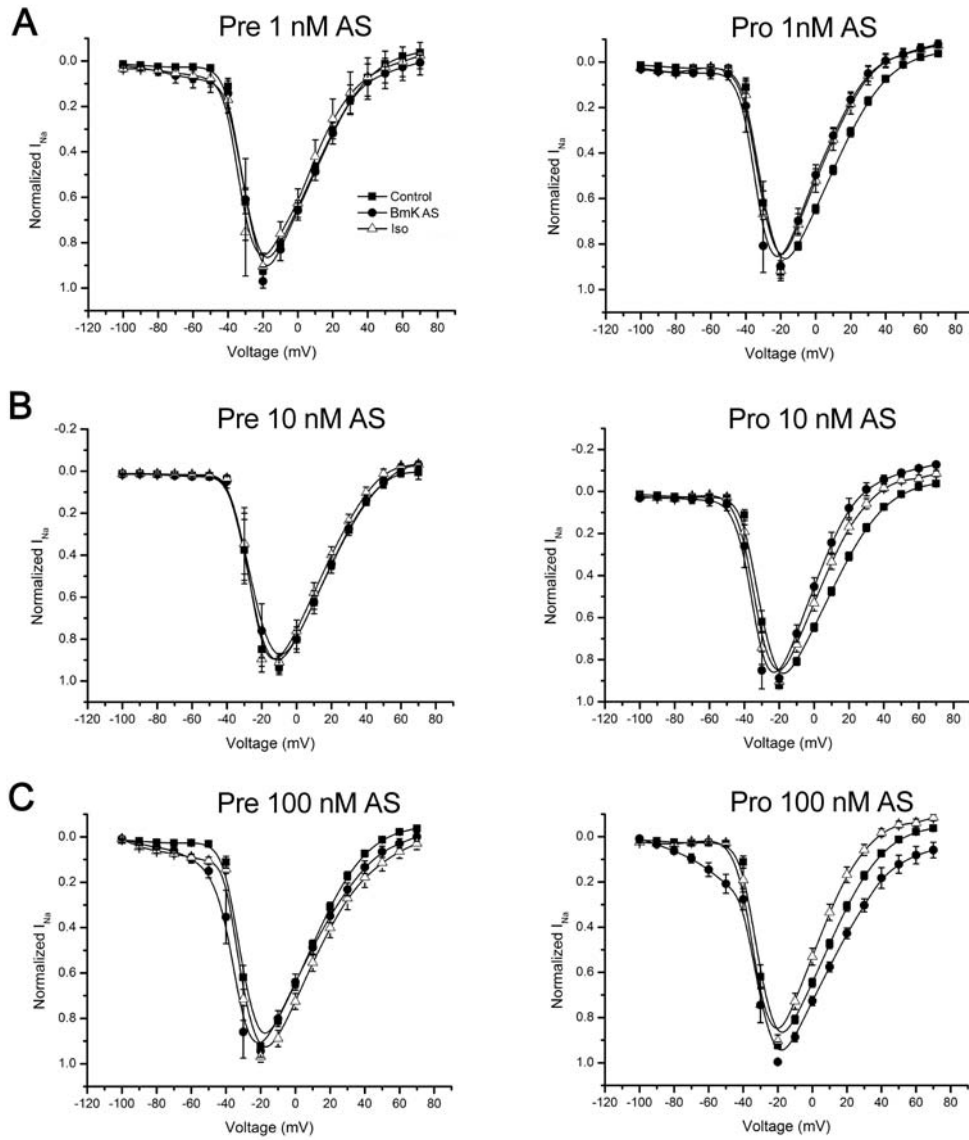

Figure S3. Effect of isoproterenol on the voltage-dependent activation of  $\text{Na}_v1.2\alpha$  expressed in *Xenopus* oocytes. Statistical plots of the I–V relationship of phosphorylated /non-phosphorylated rNav1.2 before (A-C, left panel) and after (A-C, right panel) application of 1, 10 and 100 nM BmK AS. Each oocyte was subjected to one concentration of BmK AS for 20 min before or after treatment of Iso.  $n=4, 6, 8, 9, 8$  and  $7$  respectively.

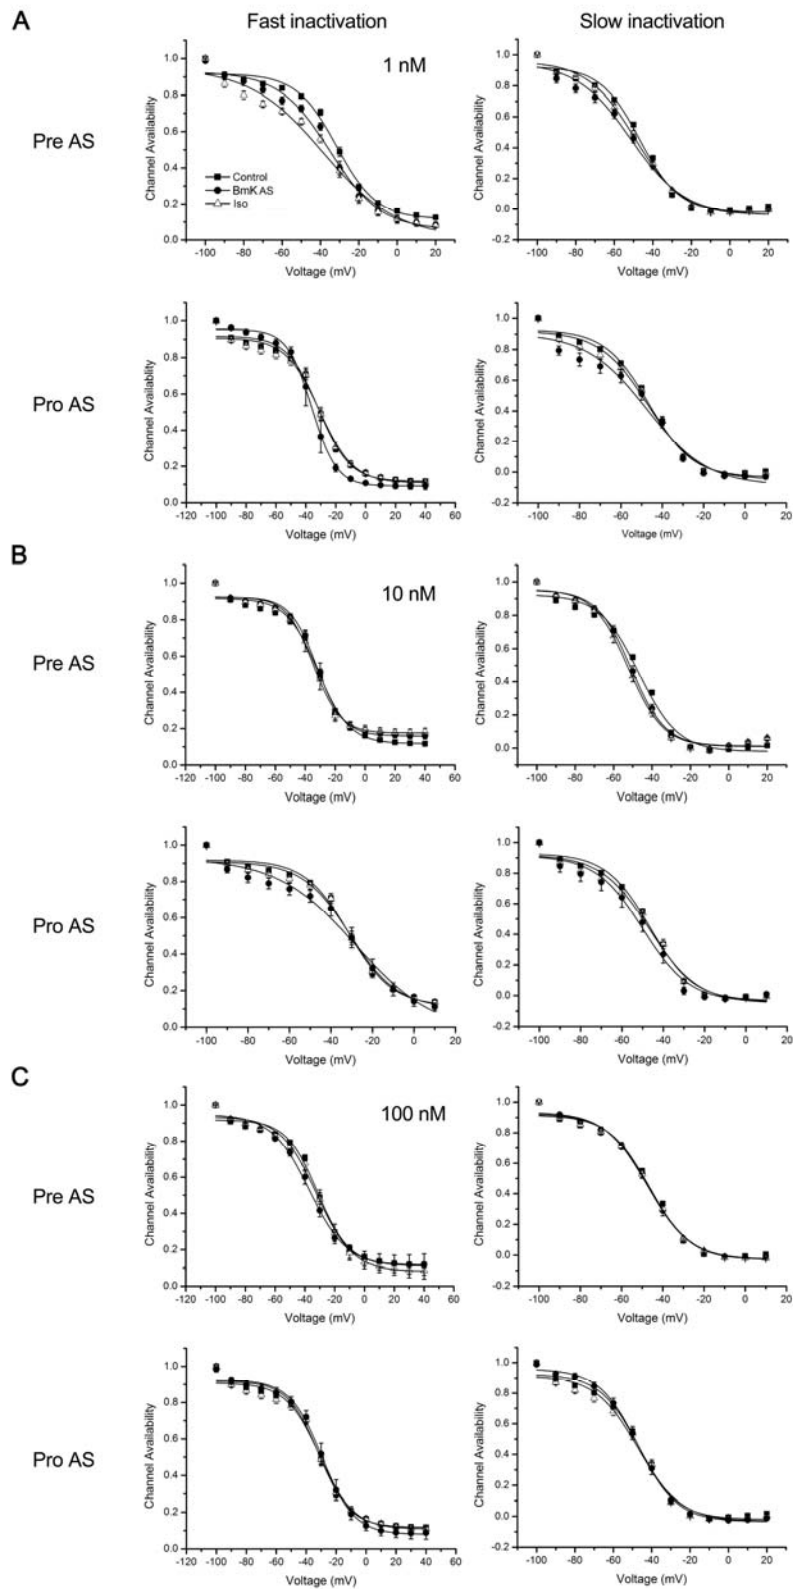

Figure S4. Modulation of BmK AS on voltage-dependent fast and slow inactivation of phosphorylated/unphosphorylated  $\text{Na}_v1.2\alpha$ . All the currents were recorded before

(Up-panel,Pre-AS) or after (Bottom-panel,Pro-AS) treatment of Iso for PKA activation. Each cell was subjected to one concentration of BmK AS for 20 min 1, 10 and 100 nM (A-C). The plots of channel availability versus voltage fit in well with Boltzmann functions for either fast inactivation (Left) or slow inactivation. The fitting parameters are indicated in Table 1. ■, control conditions; △, 100 μM Iso treatment; ●, BmK AS administration.

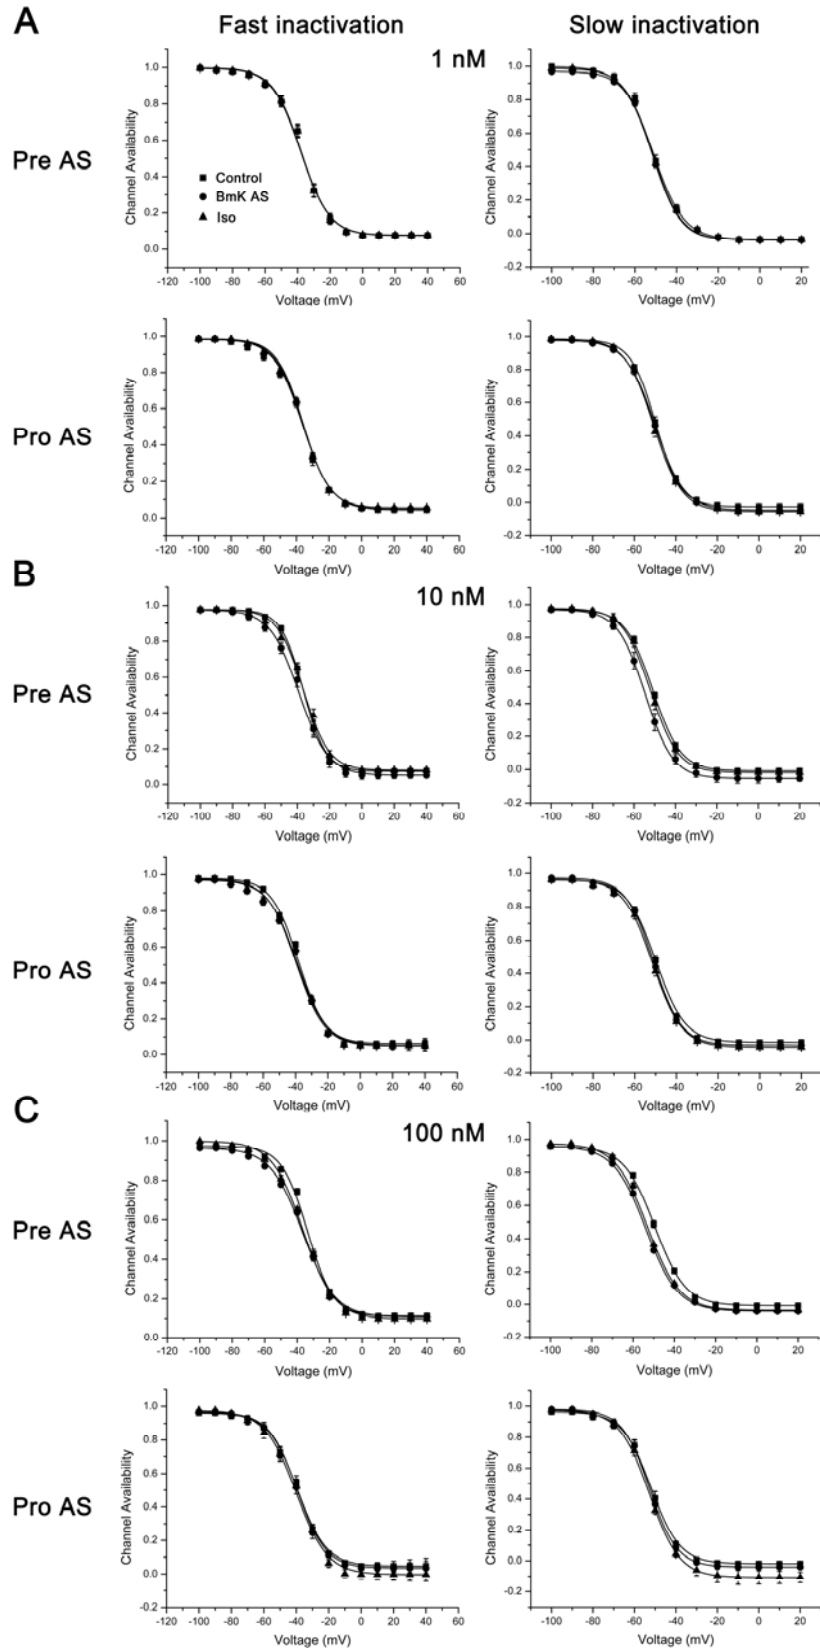

Figure S5. Modulation of BmK AS on voltage-dependent fast and slow inactivation of phosphorylated/unphosphorylated  $\text{Na}_v1.2$  ( $\alpha+\beta1$ ). All the currents were recorded

before (Up-panel,Pre-AS) or after (Bottom-panel,Pro-AS) treatment of Iso for PKA activation. Each cell was subjected to one concentration of BmK AS for 20 min 1, 10 and 100 nM (A-C). The plots of channel availability versus voltage fit in well with Boltzmann functions for either fast inactivation (Left) or slow inactivation. The fitting parameters are indicated in Table 2. ■, control conditions; ▲, 100  $\mu$ M Iso treatment; ●, BmK AS administration.

## 2. Supplementary table:

Table S1: Parameters for voltage-dependence activation and inactivation of Na<sub>v</sub>1.2 $\alpha$  after applying with different concentrations of isoproterenol

| Iso <sup>1</sup>                 | Control           | 1 $\mu$ M      | Control           | 10 $\mu$ M | Control           | 200 $\mu$ M |                   |   |                   |   |                   |   |
|----------------------------------|-------------------|----------------|-------------------|------------|-------------------|-------------|-------------------|---|-------------------|---|-------------------|---|
| <b>Activation</b>                |                   | N <sup>2</sup> | N                 | N          | N                 | N           |                   |   |                   |   |                   |   |
| V <sub>1/2</sub> (mV)            | -28.05 $\pm$ 0.42 | 6              | -27.25 $\pm$ 0.67 | 6          | -30.67 $\pm$ 2.34 | 5           | -29.48 $\pm$ 0.89 | 5 | -30.48 $\pm$ 1.23 | 5 | -29.65 $\pm$ 0.98 | 6 |
| k <sub>m</sub> (mV)              | 4.93 $\pm$ 0.35   |                | 4.36 $\pm$ 1.03   |            | 5.00 $\pm$ 0.73   |             | 3.99 $\pm$ 0.36   |   | 4.40 $\pm$ 0.29   |   | 5.01 $\pm$ 0.24   |   |
| <b>Steady-state inactivation</b> |                   |                |                   |            |                   |             |                   |   |                   |   |                   |   |
| V <sub>1/2</sub> (mV)            | -51.30 $\pm$ 0.34 | 5              | -52.27 $\pm$ 0.21 | 6          | -54.22 $\pm$ 0.34 | 6           | -56.44 $\pm$ 0.35 | 5 | -51.11 $\pm$ 0.25 | 6 | -51.32 $\pm$ 0.35 | 6 |
| k <sub>m</sub> (mV)              | 6.54 $\pm$ 0.30   |                | 6.52 $\pm$ 0.34   |            | 6.53 $\pm$ 0.56   |             | 6.57 $\pm$ 0.32   |   | 6.23 $\pm$ 0.36   |   | 5.24 $\pm$ 0.48   |   |
| <b>Fast inactivation</b>         |                   |                |                   |            |                   |             |                   |   |                   |   |                   |   |
| V <sub>1/2</sub> (mV)            | -34.93 $\pm$ 0.65 | 6              | -35.62 $\pm$ 0.69 | 6          | -34.38 $\pm$ 0.75 | 6           | -35.92 $\pm$ 0.73 | 6 | -27.91 $\pm$ 0.53 | 6 | -27.95 $\pm$ 0.58 | 6 |
| k <sub>m</sub> (mV)              | 8.76 $\pm$ 0.47   |                | 9.44 $\pm$ 0.50   |            | 8.39 $\pm$ 0.51   |             | 8.92 $\pm$ 0.48   |   | 6.78 $\pm$ 0.35   |   | 7.56 $\pm$ 0.46   |   |
| <b>Slow inactivation</b>         |                   |                |                   |            |                   |             |                   |   |                   |   |                   |   |
| V <sub>1/2</sub> (mV)            | -47.68 $\pm$ 0.32 | 6              | -48.66 $\pm$ 0.65 | 6          | -50.32 $\pm$ 0.54 | 6           | -52.82 $\pm$ 0.78 | 6 | -45.18 $\pm$ 0.21 | 5 | -45.26 $\pm$ 0.27 | 5 |
| k <sub>m</sub> (mV)              | 8.02 $\pm$ 0.38   |                | 7.91 $\pm$ 0.35   |            | 7.36 $\pm$ 0.32   |             | 7.57 $\pm$ 0.35   |   | 6.03 $\pm$ 0.28   |   | 6.01 $\pm$ 0.33   |   |

<sup>1</sup> Kinetic parameters were listed as Mean $\pm$ SEM separately.

<sup>2</sup> N indicates the number of samples tested.
